# Supplementary material for: Lanthanide-doped NaScF4 nanoprobes: crystal structure, optical spectroscopy and biodetection
Source: Royal Society of Chemistry journal article supplement (doi:10.1039/c3nr01529g), 2013-01-01
Supplement: c3nr01529g.pdf [file c3nr01529g.pdf]

# Supporting Information

## Lanthanide-Doped NaScF<sub>4</sub> Nanoprobes: Crystal Structure, Optical Spectroscopy and Biodetection

Yu Ai,<sup>abc</sup> Datao Tu,<sup>a</sup> Wei Zheng,<sup>a</sup> Yongsheng Liu,<sup>a</sup> Jintao Kong,<sup>ac</sup> Ping Hu,<sup>b</sup> Zhuo Chen,<sup>b</sup> Mingdong Huang,<sup>b</sup> and Xueyuan Chen<sup>\*ab</sup>

<sup>a</sup> Key Laboratory of Optoelectronic Materials Chemistry and Physics, Fujian Institute of Research on the Structure of Matter, Chinese Academy of Sciences, Fuzhou, Fujian 350002, China.

<sup>b</sup> State Key Laboratory of Structural Chemistry, and Danish-Chinese Centre for Proteases and Cancer, Fujian Institute of Research on the Structure of Matter, Chinese Academy of Sciences, Fuzhou, Fujian 350002, China.

<sup>c</sup> University of Chinese Academy of Sciences, Beijing 100049, China.

\*Corresponding author, E-mail: [xchen@fjirsm.ac.cn](mailto:xchen@fjirsm.ac.cn)

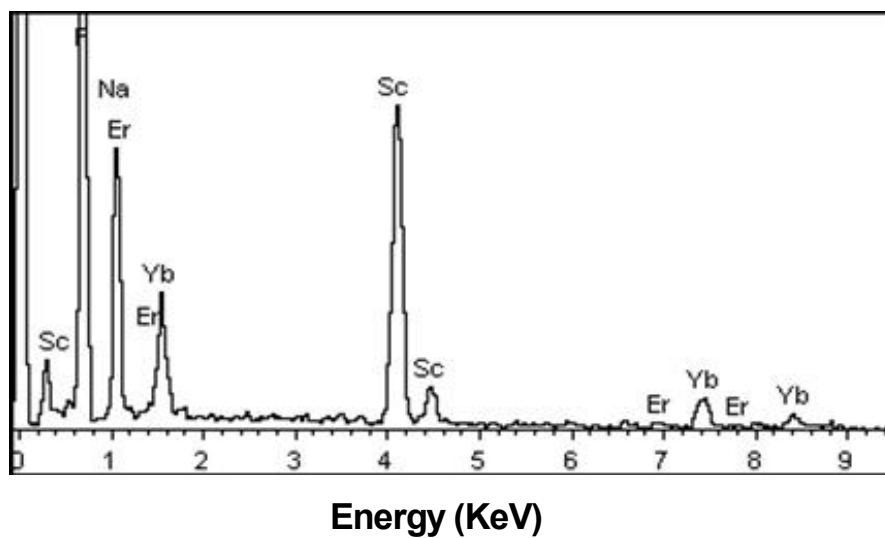

**Fig. S1** Energy dispersive X-ray (EDX) spectrum analysis of  $\text{NaScF}_4:0.02\text{Er}^{3+}/0.18\text{Yb}^{3+}$  NPs, revealing successfully doping of  $\text{Er}^{3+}/\text{Yb}^{3+}$  into  $\text{NaScF}_4$  host.

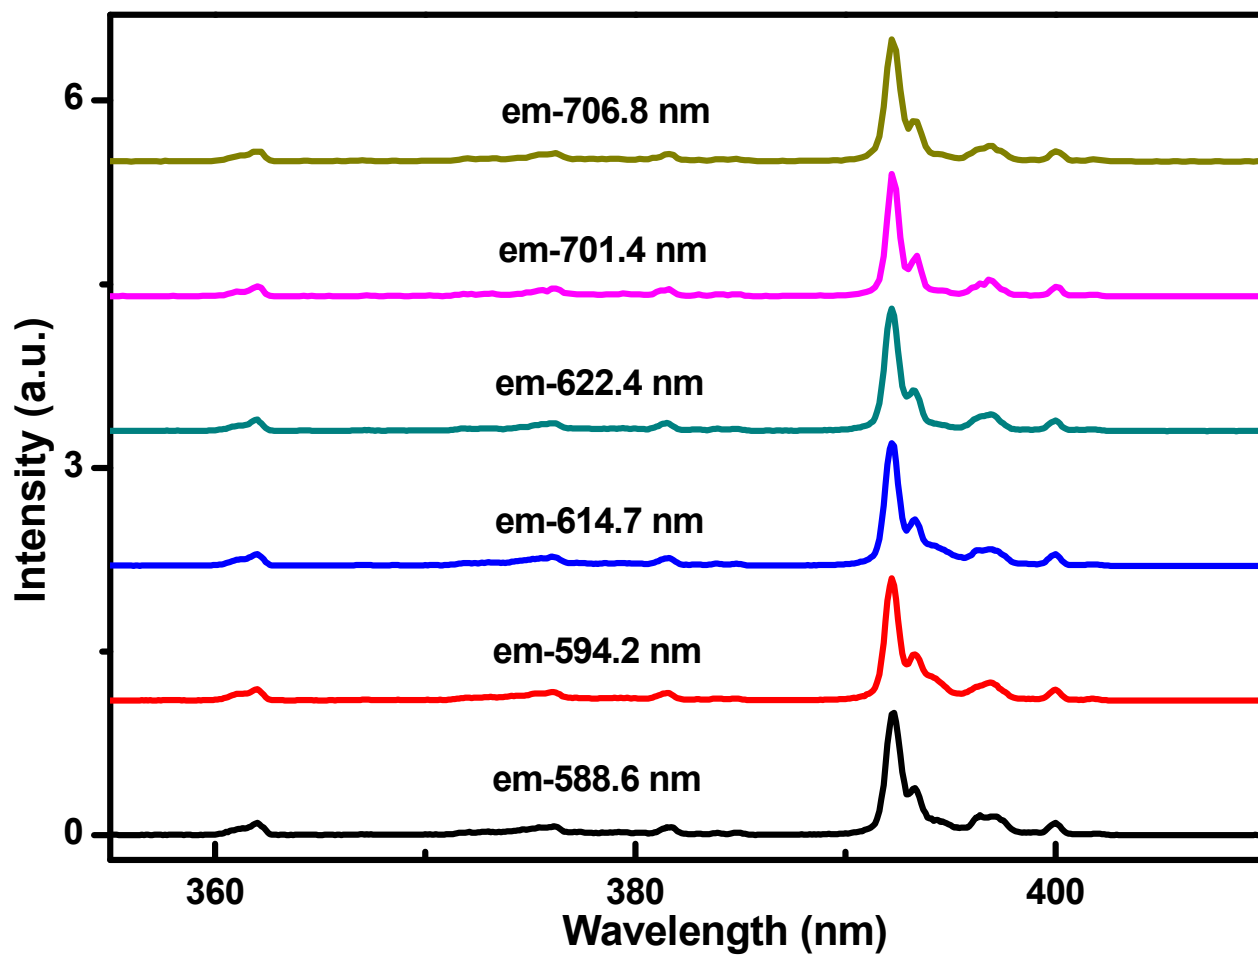

**Fig. S2** 10 K PL excitation spectra of Eu<sup>3+</sup> at site B in NaScF<sub>4</sub> microcrystals by monitoring the emissions at 588.6, 594.2, 614.7, 622.4, 701.4 and 706.8 nm, respectively.

**Table S1. Selected Bond Lengths (Å) and Angles (°) for NaScF<sub>4</sub>**

|                       |            |                     |            |
|-----------------------|------------|---------------------|------------|
| Sc(1)-F(3)            | 2.009(4)   | Sc(4)-F(13)         | 1.997(4)   |
| Sc(1)-F(12)#1         | 2.053(3)   | Sc(4)-F(14)         | 2.022(4)   |
| Sc(1)-F(4)#2          | 2.061(3)   | Sc(4)-F(11)         | 2.054(4)   |
| Sc(1)-F(2)#3          | 2.078(3)   | Sc(4)-F(15)         | 2.077(4)   |
| Sc(1)-F(2)            | 2.098(3)   | Sc(4)-F(17)         | 2.082(4)   |
| Sc(1)-F(20)#4         | 2.099(4)   | Sc(4)-F(16)         | 2.114(4)   |
| Sc(1)-F(1)            | 2.117(3)   | Sc(4)-F(10)#6       | 2.165(4)   |
| Sc(2)-F(5)            | 2.018(4)   | Sc(5)-F(24)#7       | 2.029(4)   |
| Sc(2)-F(6)            | 2.019(4)   | Sc(5)-F(19)         | 2.039(4)   |
| Sc(2)-F(4)            | 2.053(4)   | Sc(5)-F(22)#8       | 2.053(4)   |
| Sc(2)-F(7)            | 2.087(4)   | Sc(5)-F(18)         | 2.073(4)   |
| Sc(2)-F(3)            | 2.111(3)   | Sc(5)-F(17)         | 2.106(4)   |
| Sc(2)-F(8)            | 2.123(4)   | Sc(5)-F(16)         | 2.113(4)   |
| Sc(2)-F(12)#5         | 2.139(4)   | Sc(5)-F(18)#8       | 2.105(4)   |
| Sc(3)-F(10)           | 2.034(4)   | Sc(6)-F(21)         | 2.019(4)   |
| Sc(3)-F(9)            | 2.041(4)   | Sc(6)-F(23)         | 2.024(4)   |
| Sc(3)-F(15)#6         | 2.039(4)   | Sc(6)-F(22)         | 2.065(4)   |
| Sc(3)-F(11)           | 2.053(4)   | Sc(6)-F(1)#9        | 2.089(4)   |
| Sc(3)-F(7)            | 2.099(4)   | Sc(6)-F(24)         | 2.096(4)   |
| Sc(3)-F(8)            | 2.114(4)   | Sc(6)-F(20)         | 2.118(4)   |
| Sc(3)-F(9)#6          | 2.142(5)   | Sc(6)-F(19)         | 2.137(4)   |
|                       |            |                     |            |
| F(3)-Sc(1)-F(12)#1    | 173.73(15) | F(13)-Sc(4)-F(14)   | 171.90(18) |
| F(3)-Sc(1)-F(4)#2     | 102.73(17) | F(13)-Sc(4)-F(11)   | 80.06(18)  |
| F(12)#1-Sc(1)-F(4)#2  | 82.54(15)  | F(14)-Sc(4)-F(11)   | 93.89(18)  |
| F(3)-Sc(1)-F(2)#3     | 86.16(15)  | F(13)-Sc(4)-F(15)   | 84.45(17)  |
| F(12)#1-Sc(1)-F(2)#3  | 92.20(13)  | F(14)-Sc(4)-F(15)   | 89.29(19)  |
| F(4)#2-Sc(1)-F(2)#3   | 73.25(14)  | F(11)-Sc(4)-F(15)   | 80.88(17)  |
| F(3)-Sc(1)-F(2)       | 78.27(13)  | F(13)-Sc(4)-F(17)   | 81.29(17)  |
| F(12)#1-Sc(1)-F(2)    | 106.57(15) | F(14)-Sc(4)-F(17)   | 106.81(17) |
| F(4)#2-Sc(1)-F(2)     | 75.57(14)  | F(11)-Sc(4)-F(17)   | 134.40(18) |
| F(2)#3-Sc(1)-F(2)     | 140.91(14) | F(15)-Sc(4)-F(17)   | 137.76(18) |
| F(3)-Sc(1)-F(20)#4    | 89.39(16)  | F(13)-Sc(4)-F(16)   | 99.52(17)  |
| F(12)#1-Sc(1)-F(20)#4 | 88.01(16)  | F(14)-Sc(4)-F(16)   | 83.70(17)  |
| F(4)#2-Sc(1)-F(20)#4  | 145.66(17) | F(11)-Sc(4)-F(16)   | 155.33(19) |
| F(2)#3-Sc(1)-F(20)#4  | 140.34(15) | F(15)-Sc(4)-F(16)   | 74.56(15)  |
| F(2)-Sc(1)-F(20)#4    | 75.68(14)  | F(17)-Sc(4)-F(16)   | 68.99(13)  |
| F(3)-Sc(1)-F(1)       | 92.00(16)  | F(13)-Sc(4)-F(10)#7 | 103.45(18) |
| F(12)#1-Sc(1)-F(1)    | 81.74(14)  | F(14)-Sc(4)-F(10)#7 | 79.67(16)  |
| F(4)#2-Sc(1)-F(1)     | 141.17(16) | F(11)-Sc(4)-F(10)#7 | 73.05(17)  |
| F(2)#3-Sc(1)-F(1)     | 72.14(13)  | F(15)-Sc(4)-F(10)#7 | 150.77(17) |
| F(2)-Sc(1)-F(1)       | 143.12(15) | F(17)-Sc(4)-F(10)#7 | 71.47(16)  |
| F(20)#4-Sc(1)-F(1)    | 68.66(14)  | F(16)-Sc(4)-F(10)#7 | 130.02(18) |

|                      |            |                       |            |
|----------------------|------------|-----------------------|------------|
| F(5)-Sc(2)-F(6)      | 169.71(17) | F(24)#7-Sc(5)-F(19)   | 173.47(16) |
| F(5)-Sc(2)-F(4)      | 92.98(15)  | F(24)#7-Sc(5)-F(22)#8 | 100.91(18) |
| F(6)-Sc(2)-F(4)      | 81.09(15)  | F(19)-Sc(5)-F(22)#8   | 84.87(17)  |
| F(5)-Sc(2)-F(7)      | 82.58(17)  | F(24)#7-Sc(5)-F(18)   | 77.72(15)  |
| F(6)-Sc(2)-F(7)      | 98.42(17)  | F(19)-Sc(5)-F(18)     | 106.79(18) |
| F(4)-Sc(2)-F(7)      | 150.58(17) | F(22)#8-Sc(5)-F(18)   | 76.64(16)  |
| F(5)-Sc(2)-F(3)      | 86.49(15)  | F(24)#7-Sc(5)-F(17)   | 90.98(18)  |
| F(6)-Sc(2)-F(3)      | 84.02(16)  | F(19)-Sc(5)-F(17)     | 82.63(16)  |
| F(4)-Sc(2)-F(3)      | 77.58(15)  | F(22)#8-Sc(5)-F(17)   | 138.76(18) |
| F(7)-Sc(2)-F(3)      | 73.13(15)  | F(18)-Sc(5)-F(17)     | 144.59(16) |
| F(5)-Sc(2)-F(8)      | 107.56(16) | F(24)#7-Sc(5)-F(16)   | 87.68(16)  |
| F(6)-Sc(2)-F(8)      | 82.19(16)  | F(19)-Sc(5)-F(16)     | 88.73(18)  |
| F(4)-Sc(2)-F(8)      | 139.49(17) | F(22)#8-Sc(5)-F(16)   | 150.18(19) |
| F(7)-Sc(2)-F(8)      | 68.52(14)  | F(18)-Sc(5)-F(16)     | 77.44(16)  |
| F(3)-Sc(2)-F(8)      | 136.57(15) | F(17)-Sc(5)-F(16)     | 68.56(14)  |
| F(5)-Sc(2)-F(12)#5   | 80.75(15)  | F(24)#7-Sc(5)-F(18)#8 | 86.68(17)  |
| F(6)-Sc(2)-F(12)#5   | 105.81(16) | F(19)-Sc(5)-F(18)#8   | 92.30(16)  |
| F(4)-Sc(2)-F(12)#5   | 76.63(14)  | F(22)#8-Sc(5)-F(18)#8 | 71.92(16)  |
| F(7)-Sc(2)-F(12)#5   | 130.56(17) | F(18)-Sc(5)-F(18)#8   | 141.38(16) |
| F(3)-Sc(2)-F(12)#5   | 150.48(14) | F(17)-Sc(5)-F(18)#8   | 69.51(15)  |
| F(8)-Sc(2)-F(12)#5   | 72.91(14)  | F(16)-Sc(5)-F(18)#8   | 137.55(16) |
| F(10)-Sc(3)-F(9)     | 107.0(2)   | F(21)-Sc(6)-F(23)     | 172.32(16) |
| F(10)-Sc(3)-F(15)#6  | 173.30(19) | F(21)-Sc(6)-F(22)     | 79.01(18)  |
| F(9)-Sc(3)-F(15)#6   | 78.03(17)  | F(23)-Sc(6)-F(22)     | 94.51(18)  |
| F(10)-Sc(3)-F(11)    | 83.17(18)  | F(21)-Sc(6)-F(1)#9    | 100.54(16) |
| F(9)-Sc(3)-F(11)     | 76.66(17)  | F(23)-Sc(6)-F(1)#9    | 83.04(15)  |
| F(15)#6-Sc(3)-F(11)  | 102.47(18) | F(22)-Sc(6)-F(1)#9    | 150.40(18) |
| F(10)-Sc(3)-F(7)     | 82.64(18)  | F(21)-Sc(6)-F(24)     | 83.27(15)  |
| F(9)-Sc(3)-F(7)      | 144.45(18) | F(23)-Sc(6)-F(24)     | 91.49(18)  |
| F(15)#6-Sc(3)-F(7)   | 90.70(19)  | F(22)-Sc(6)-F(24)     | 78.80(16)  |
| F(11)-Sc(3)-F(7)     | 138.9(2)   | F(1)#9-Sc(6)-F(24)    | 71.81(15)  |
| F(10)-Sc(3)-F(8)     | 89.02(19)  | F(21)-Sc(6)-F(20)     | 81.80(15)  |
| F(9)-Sc(3)-F(8)      | 77.41(17)  | F(23)-Sc(6)-F(20)     | 105.86(16) |
| F(15)#6-Sc(3)-F(8)   | 87.84(17)  | F(22)-Sc(6)-F(20)     | 139.03(18) |
| F(11)-Sc(3)-F(8)     | 149.3(2)   | F(1)#9-Sc(6)-F(20)    | 68.81(13)  |
| F(7)-Sc(3)-F(8)      | 68.48(13)  | F(24)-Sc(6)-F(20)     | 134.17(16) |
| F(10)-Sc(3)-F(9)#6   | 91.78(17)  | F(21)-Sc(6)-F(19)     | 100.57(17) |
| F(9)-Sc(3)-F(9)#6    | 140.98(17) | F(23)-Sc(6)-F(19)     | 81.39(15)  |
| F(15)#6-Sc(3)-F(9)#6 | 86.62(19)  | F(22)-Sc(6)-F(19)     | 74.22(16)  |
| F(11)-Sc(3)-F(9)#6   | 71.95(17)  | F(1)#9-Sc(6)-F(19)    | 133.82(17) |
| F(7)-Sc(3)-F(9)#6    | 70.16(15)  | F(24)-Sc(6)-F(19)     | 151.37(15) |
| F(8)-Sc(3)-F(9)#6    | 138.15(16) | F(20)-Sc(6)-F(19)     | 74.23(15)  |

---

**Symmetry transformations used to generate equivalent atoms:**

#1 -y+1,x-y+1,z+1/3

#2  $-y, x-y+1, z+1/3$

#3  $-x+y-1, -x, z-1/3$

#4  $-x+y-1, -x+1, z+2/3$

#5  $-x+y-1, -x+1, z-1/3$

#6  $-y+1, x-y+2, z+1/3$

#7  $-x+y-1, -x+2, z+2/3$

#8  $-y+2, x-y+3, z+1/3$

#9  $-y+1, x-y+2, z-2/3$

**Table S2. Atomic coordinates ( $\times 10^4$ ) and equivalent isotropic displacement parameters U (eq) ( $\text{\AA}^2 \times 10^3$ ) for NaScF<sub>4</sub>.**

| Atom  | x        | y        | z        | U(eq) |
|-------|----------|----------|----------|-------|
| Sc(1) | -2168(1) | 3842(1)  | 7278(1)  | 4(1)  |
| Sc(2) | -2173(1) | 5749(1)  | 3988(1)  | 7(1)  |
| Sc(3) | -549(1)  | 8841(1)  | 4184(2)  | 14(1) |
| Sc(4) | 1284(1)  | 12417(1) | 4139(2)  | 10(1) |
| Sc(5) | 2826(1)  | 15506(1) | 4268(2)  | 8(1)  |
| Sc(6) | 4557(1)  | 15471(1) | 907(1)   | 7(1)  |
| Na(1) | -3829(3) | 5626(3)  | 7294(3)  | 23(1) |
| Na(2) | 2710(3)  | 10508(3) | 3896(3)  | 19(1) |
| Na(3) | 2888(3)  | 13946(3) | 7647(3)  | 19(1) |
| Na(4) | 4567(3)  | 13963(3) | 4296(3)  | 19(1) |
| Na(5) | 1221(3)  | 13870(3) | 658(3)   | 22(1) |
| Na(6) | 2815(3)  | 12188(3) | 888(4)   | 27(1) |
| F(1)  | -533(3)  | 4105(3)  | 6448(4)  | 13(1) |
| F(2)  | -2910(3) | 4566(3)  | 8681(4)  | 14(1) |
| F(3)  | -2065(3) | 5188(3)  | 6093(4)  | 15(1) |
| F(4)  | -3409(3) | 3966(3)  | 3930(4)  | 22(1) |
| F(5)  | -817(3)  | 5471(3)  | 3484(4)  | 13(1) |
| F(6)  | -3586(3) | 5820(3)  | 4784(4)  | 15(1) |
| F(7)  | -826(4)  | 7228(3)  | 5055(4)  | 21(1) |
| F(8)  | -1827(4) | 7365(3)  | 2987(4)  | 20(1) |
| F(9)  | -1235(3) | 9595(3)  | 2840(4)  | 26(1) |
| F(10) | 760(4)   | 8756(4)  | 3075(5)  | 28(1) |
| F(11) | 686(4)   | 10624(3) | 4282(5)  | 32(1) |
| F(12) | 4610(3)  | 12094(3) | 5067(4)  | 11(1) |
| F(13) | 2716(3)  | 12385(4) | 3407(4)  | 20(1) |
| F(14) | -302(4)  | 12240(4) | 4710(4)  | 21(1) |
| F(15) | 651(4)   | 11919(4) | 2049(5)  | 25(1) |
| F(16) | 1548(4)  | 13992(3) | 3126(4)  | 17(1) |
| F(17) | 2592(4)  | 13921(3) | 5196(4)  | 18(1) |
| F(18) | 2090(3)  | 16219(3) | 2883(4)  | 24(1) |
| F(19) | 4130(3)  | 15416(3) | 3143(4)  | 17(1) |
| F(20) | 4920(3)  | 14198(3) | 1851(4)  | 15(1) |
| F(21) | 3102(3)  | 13985(3) | 193(4)   | 15(1) |
| F(22) | 3288(4)  | 15986(4) | 1017(5)  | 34(1) |
| F(23) | 5920(3)  | 17082(3) | 1498(4)  | 18(1) |
| F(24) | 4597(3)  | 16062(4) | -1207(4) | 20(1) |

**Table S3. Absolute quantum yields (QYs) of the NaScF<sub>4</sub>:0.02Er<sup>3+</sup>/0.18Yb<sup>3+</sup> and NaYF<sub>4</sub>:0.02Er<sup>3+</sup>/0.20Yb<sup>3+</sup> samples.**

| NaScF <sub>4</sub> (this work) |        | NaYF <sub>4</sub> (Ref.1) <sup>1</sup> |        |
|--------------------------------|--------|----------------------------------------|--------|
| Average particle size/nm       | QY (%) | Average particle size/nm               | QY (%) |
| 115 ± 11                       | 0.61   | 100                                    | 0.3    |
| 41.6 ± 3.5                     | 0.09   | 30                                     | 0.1    |
| 19.6 ± 1.3                     | 0.02   | 10                                     | 0.005  |

1.J.-C. Boyer and F. C. J. M. van Veggel, *Nanoscale*, 2010, **2**, 1417-1419.
